# Supplementary material
Source: Springer Nature journal article supplement (https://www.springermedizin.de/resource/supplementary/12968_2009_530_MOESM2_ESM.pdf/9579190)

# Raw Images

# T2 Maps

Centric

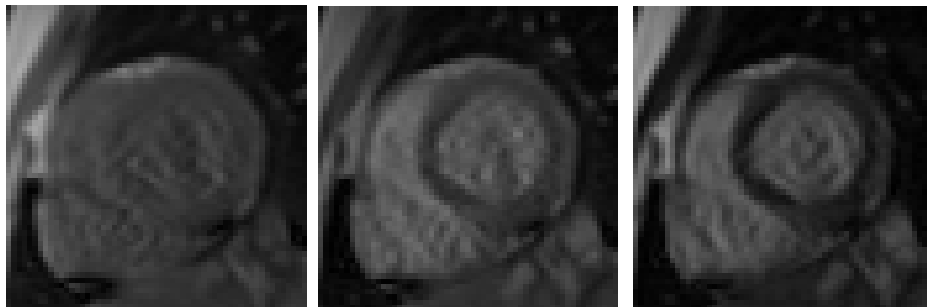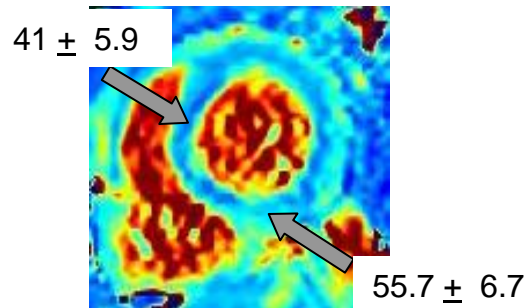

Linear

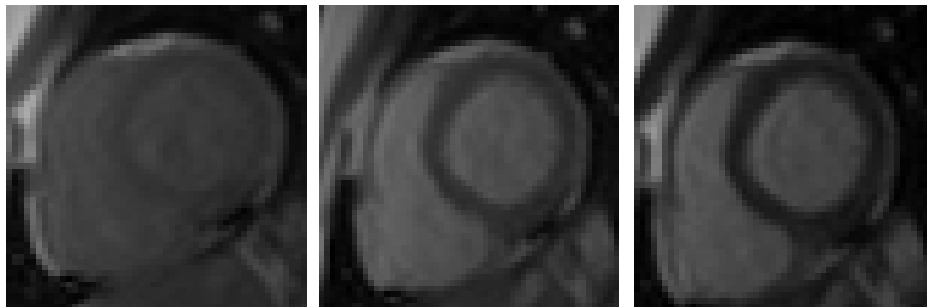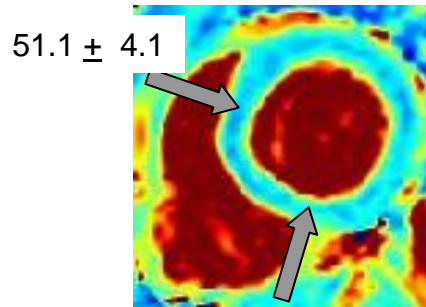

T2p = 0 ms

T2p = 24 ms

T2p = 55 ms

$55.9 \pm 6.7$

Supplement: MOESM2 [file 9579190]
